1 **Supervised machine learning reveals introgressed loci in the genomes of *Drosophila***  
2 ***simulans* and *D. sechellia***

3  
4 Daniel R. Schrider<sup>\*,†,1</sup>, Julien Ayroles<sup>§</sup>, Daniel R. Matute<sup>‡</sup>, Andrew D. Kern<sup>\*,†</sup>

5  
6 <sup>\*</sup>Department of Genetics, and <sup>†</sup>Human Genetics Institute of New Jersey, Rutgers University,  
7 Piscataway, New Jersey 08554

8  
9 <sup>§</sup>Ecology and Evolutionary Biology Department; Lewis Sigler Institute for Integrative Genomic,  
10 Princeton University, Princeton, New Jersey, 08540

11  
12 <sup>‡</sup>Biology Department, University of North Carolina, Chapel Hill, NC 27510.

13  
14 <sup>1</sup>Corresponding author: Department of Genetics, Rutgers University, 604 Allison Rd.,  
15 Piscataway, NJ 08854. E-mail: dan.schrider@rutgers.edu

16  
17 **ABSTRACT**

18  
19 Hybridization and gene flow between species appears to be common. Even though it is clear that  
20 hybridization is widespread across all surveyed taxonomic groups, the magnitude and  
21 consequences of introgression are still largely unknown. Thus it is crucial to develop the  
22 statistical machinery required to uncover which genomic regions have recently acquired  
23 haplotypes via introgression from a sister population. We developed a novel machine learning  
24 framework, called FILET (Finding Introgressed Loci via Extra-Trees) capable of revealing  
25 genomic introgression with far greater power than competing methods. FILET works by  
26 combining information from a number of population genetic summary statistics, including  
27 several new statistics that we introduce, that capture patterns of variation across two populations.  
28 We show that FILET is able to identify loci that have experienced gene flow between related  
29 species with high accuracy, and in most situations can correctly infer which population was the  
30 donor and which was the recipient. Here we describe a data set of outbred diploid *Drosophila*  
31 *sechellia* genomes, and combine them with data from *D. simulans* to examine recent  
32 introgression between these species using FILET. Although we find that these populations may  
33 have split more recently than previously appreciated, FILET confirms that there has indeed been  
34 appreciable recent introgression (some of which might have been adaptive) between these  
35 species, and reveals that this gene flow is primarily in the direction of *D. simulans* to *D.*  
36 *sechellia*.

37  
38  
39  
40

## 41 INTRODUCTION

42  
43 Up to 10% of animal species have the ability to hybridize with other species (Mallet 2005).  
44 Hybridization upon secondary contact of diverging populations is quite common which has led  
45 to the study of hybrid zones and the phenotypic consequences of hybridization (Barton and  
46 Hewitt 1985). Whole-genome sequencing has confirmed the notion that introgression, the  
47 genetic exchange between species through fertile hybrids, is also common between closely  
48 related species (Begun et al. 2007; Kulathinal et al. 2009; Martin et al. 2013; Brandvain et al.  
49 2014; Fontaine et al. 2015) and in some instances between divergent species (Nürnbergger et al.  
50 2016; Turissini and Matute 2017). This is perhaps best known from the case of Neanderthal  
51 hybridization with non-African human populations (Green et al. 2010; Sankararaman et al.  
52 2014), which has left modern human genomes with clear examples of introgressed Neanderthal  
53 alleles. Depending on the genetic architecture of reproductive isolation (i.e., number of hybrid  
54 incompatibilities, dominance of those incompatibilities), introgression might be deleterious (True  
55 et al. 1996; Harris and Nielsen 2016; Juric et al. 2016). Those loci that contribute to reproductive  
56 isolation, and as such to the persistence of species in the face of hybridization, should be less  
57 likely to be introgressed (Turner et al. 2005). On the other hand, much of the genome may be  
58 porous to introgression between closely related species if the net effect of such introgression is  
59 fitness neutral. Thus if we could reliably delineate those regions of the genome that have and  
60 have not experienced introgression among species, and the magnitude of selection against them,  
61 we may be able to understand the genetic underpinnings of reproductive isolation.

62 Genetic exchange between populations can also provide a potent source of adaptive  
63 alleles that may facilitate adaptation to new environments (reviewed in Hedrick 2013). Rather  
64 than waiting for one or more new beneficial mutations to arise, a species faced with a new  
65 environment may be able to receive these alleles via gene flow from a sympatric species already  
66 adapted for that environment (e.g. if the donor population migrated to this new environment first  
67 and/or adapted to it more rapidly). For instance, adaptation to high altitude in Tibetans appears to  
68 have been caused by introgression of alleles from an archaic Denisovan-like source into modern  
69 humans (Huerta-Sánchez et al. 2014). Another particularly well-studied system of adaptive  
70 introgression comes from *Heliconius* butterflies where gene exchange has facilitated the origin  
71 and maintenance of mimetic rings (Pardo-Díaz et al. 2012) and even of hybrid species (Melo et  
72 al. 2009; Salazar et al. 2010). Clearly, hybridization and introgression play an important role in  
73 the origin or demise of new species. Yet these isolated examples are not sufficient to elucidate  
74 the importance of introgression a source of genetic variation. A reliable framework for the  
75 inference of introgressed alleles is therefore sorely needed.

76 Recent work on uncovering introgressed loci has focused on the use of population  
77 genomic data from pairs of species of distinct populations. Largely the methods devised have  
78 consisted of new summary statistics that capture elements of the expected coalescent genealogy  
79 under a model of recent introgression between species. For example, values of the  $F_{ST}$  statistic  
80 will be lower in the presence of gene flow (e.g. Neafsey et al. 2010). Another popular point of

81 departure has been the  $d_{xy}$  statistic of Nei and Li (1979) which measures the average pairwise  
82 distance between alleles sampled from two populations. Joly et al. (2009) modified this approach  
83 by taking the minimum rather than the mean of these pairwise divergence values, termed  $d_{min}$ .  
84  $d_{min}$  is thus sensitive to abnormally short branch lengths between alleles drawn from two  
85 populations, as would be expected under a model of recent introgression. Similarly, Geneva et al.  
86 (2015) and Rosenzweig et al. (2016) devised with their own statistics to detect introgression,  
87 both based on  $d_{min}$  but with added robustness to variation in the neutral mutation rate. Each of  
88 these statistics has attractive properties and adequate power in some instances, however no one  
89 statistic has perfect sensitivity in every scenario.

90 In order to fill this void, we introduce a new method for finding introgressed loci based  
91 on supervised machine learning that we call FILET (Finding Introgressed Loci using Extra Trees  
92 Classifiers). FILET combines a large number of summary statistics (Materials and Methods) that  
93 provide complementary information about the shape of the genealogy underlying a region of the  
94 genome. These summary statistics include both previously developed statistics (including, but  
95 not limited to, those based on  $d_{min}$  and  $d_{xy}$ ) as well as 5 new summary statistics that we describe  
96 below. Our reasoning for this approach was that by combining many statistics for detecting  
97 introgression we should achieve sensitivity to introgression across a larger range of scenarios  
98 than accessible to any individual statistic. Buoyed by our recent work showing the power and  
99 flexibility of Extra Trees classifiers (Geurts et al. 2006) for population genomic inference  
100 (Schrider and Kern 2016; Schrider and Kern 2017), we leveraged this machine learning  
101 paradigm for identification of introgression. Using simulations we show that FILET is far more  
102 powerful and versatile than competing methods for identifying introgressed loci. Further we  
103 apply FILET to examine patterns of introgression between *Drosophila simulans* and its island  
104 endemic sister taxon *Drosophila sechellia*.

105 The speciation event that gave rise to the island endemic *Drosophila sechellia* from a  
106 *Drosophila simulans*-like ancestor is a textbook example of a specialist species that evolved  
107 from a presumably generalist ancestor (Jones 1998, 2005). Indeed, *D. sechellia* has quite  
108 remarkably specialized to breed on the toxic fruit of *Morinda citrifolia* (Louis and David 1986),  
109 while *D. simulans* (and *D. mauritiana*) do not tolerate the organic volatile compounds in the ripe  
110 fruit (Legal et al. 1994; Farine et al. 1996; Legal et al. 1999). The genetic and neurological  
111 underpinnings of this key ecological difference have been identified, at least in part (Dekker et  
112 al. 2006; Matsuo et al. 2007; Hungate et al. 2013; Huang and Erezylmaz 2015; Shiao et al.  
113 2015; Andrade López et al. 2017) making the *D. simulans*/*D. sechellia* pair one of the most  
114 successful cases of genetical dissection the causes of an ecologically relevant trait. While this is  
115 so, the population genetics of divergence between these species has only been examined in the  
116 context of either population samples from a handful of loci (Hey and Kliman 1993; Kliman et al.  
117 2000; Kern et al. 2004; Legrand et al. 2009) or in the absence of population data (Garrigan et al.  
118 2012). These studies estimated population divergence time between *D. simulans* and *D. sechellia*  
119 to be as early as ~250,000 years ago (Garrigan et al. 2012) or as old as ~413,000 years ago  
120 (Kliman et al. 2000). All population genomic surveys demonstrate that *D. sechellia* harbors little

121 genetic variation in comparison to *D. simulans*, perhaps as a result of a population size  
122 crash/founder event from which the population has not recovered (Hey and Kliman 1993;  
123 Legrand et al. 2009). Moreover it has been suggested that what little variation there is in *D.*  
124 *sechellia* shows little population genetic structure among separate island populations in the  
125 Seychelles archipelago (Legrand et al. 2009). Lastly there is some evidence of introgression  
126 between each pair of species within the *D. simulans* complex (Garrigan et al. 2012), and *D.*  
127 *simulans* and *D. sechellia* have been found to hybridize in the field (Matute and Ayroles 2014).  
128 Here we characterize the population genetics of divergence between *D. sechellia* and *D.*  
129 *simulans*, combining existing whole-genome sequences from a mainland population of *D.*  
130 *simulans* (Rogers et al. 2014) with newly generated genome sequences from *D. sechellia*.  
131 Applying FILET to these data confirms previous reports of introgression between these species  
132 and reveals that this gene flow is primarily in the direction of *D. simulans* to *D. sechellia*.  
133 Finally, the success of our approach underscores the potential power of supervised machine  
134 learning for evolutionary and population genetic inference.

135

## 136 MATERIALS AND METHODS

137

### 138 Statistics capturing the population genetic signature of introgression

139

140 We set out to assemble a set of statistics that could be used in concert to reliably determine  
141 whether a given genomic window had experienced recent gene flow. Several statistics that have  
142 been designed to this end ask whether there is a pair of samples exhibiting a lower than expected  
143 degree of sequence divergence within the window of interest. The most basic of these is  $d_{min}$ , the  
144 minimum pairwise divergence across all cross-population comparisons (Figure S1; Joly et al.  
145 2009). The reasoning behind  $d_{min}$  is that even if only a single sampled individual contains an  
146 introgressed haplotype,  $d_{min}$  should be lower than expected and the introgression event may be  
147 detectable. A related statistic is  $G_{min}$ , which is equal to  $d_{min}/d_{xy}$  (Geneva et al. 2015); the presence  
148 of this term in the denominator is meant to control for variation in the neutral mutation rate  
149 across the genome.  $RND_{min}$  accomplishes this by dividing  $d_{min}$  by the average divergence of all  
150 sequences from either species to an outgroup sequence (Rosenzweig et al. 2016). The name of  
151 this statistic is derived from its constituent parts,  $d_{min}$ , and  $RND$  (Feder et al. 2005).

152 As described in the following section, we incorporated a number of previously devised  
153 statistics into our classification approach, including some of those based on  $d_{min}$ . We also  
154 included some novel statistics that we designed to have improved sensitivity to particularly  
155 recent introgression. The first of these is defined as:

$$156 \quad d_{d1} = d_{min}/\pi_1$$

157 where  $\pi_1$  is nucleotide diversity (Nei and Li 1979) in population 1. Similarly,  $d_{d2} = d_{min}/\pi_2$ .  $d_{d1}$   
158 and  $d_{d2}$  statistics are so named because they compare  $d_{min}$  to diversity within populations 1 and 2,  
159 respectively. The rationale behind these statistics is that, if there has been recent introgression  
160 from population 1 into population 2, and at least one sampled chromosome from population 2

161 contains the introgressed haplotype, then the cross-population pair of individuals yielding the  
162 value of  $d_{min}$  should both trace their ancestry to population 1. Thus, the sequence divergence  
163 between these two individuals should on average be equal to  $\pi_1$ . Similarly, if there was  
164 introgression in the reverse direction  $d_{min}$  would be on the order of  $\pi_2$ . Following similar  
165 rationale, we devised two related statistics:  $d_{d-Rank1}$  and  $d_{d-Rank2}$ .  $d_{d-Rank1}$  is the percentile ranking  
166 of  $d_{min}$  among all pairwise divergences *within* population 1; the value of this statistic should be  
167 lower when there has been introgression from population 1 into population 2.  $d_{d-Rank2}$  is the  
168 analogous statistic for introgression from population 2 into population 1. We also included a  
169 statistic comparing average linkage disequilibrium within populations to average LD within the  
170 global population (i.e. lumping all individuals from both species together), as follows:

$$171 \quad Z_X = (Z_{nS1} + Z_{nS2}) / (2 \times Z_{nSG})$$

172 where  $Z_{nS1}$ , and  $Z_{nS2}$  measure average LD (Kelly 1997) between all pairs of variants within the  
173 window in population 1 and population 2, respectively, and  $Z_{nSG}$  which measures LD within the  
174 global population. The reasoning behind this statistic is based on the assumption that, in the  
175 presence of gene flow, LD may be elevated within the recipient population(s) but not in the  
176 global population. Figure S2 shows that the distributions of these statistics do indeed differ  
177 substantially between genealogies with and without introgression (simulation scenarios described  
178 below), especially when this introgression occurred recently. In addition to these and other  
179 statistics summarizing diversity across the two population samples, we also incorporated several  
180 single-population statistics into our classifier (see below), as these may also contain information  
181 about recent introgression. For example, separate measures of nucleotide diversity in our two  
182 population samples would contain useful information because introgression is expected to  
183 increase diversity in the recipient population, especially if the source population was large or if  
184 the two populations split long ago.

185

## 186 **Description of FILET classifier**

187

188 We used a supervised machine learning approach to assign a genomic window to one of three  
189 distinct classes on the basis of a “feature vector” consisting of a number of statistics  
190 summarizing patterns of variation within the window from two closely related populations.  
191 These three classes are: introgression from population 1 into population 2, introgression from  
192 population 2 into population 1, and the absence of introgression. Specifically, we used an Extra-  
193 Trees classifier (Geurts et al. 2006), which is an extension of random forests (Breiman 2001), an  
194 ensemble learning technique that creates a large ensemble of semi-randomly generated binary  
195 decision trees (Quinlan 1986), before taking a vote among these decision trees in order to decide  
196 which class label should be assigned to a given data instance (i.e. genomic window in our case).  
197 In an Extra-Trees classifier, the tree building process is even more randomized than in typical  
198 random forests: in addition to selecting a random subset of features when generating a tree, the  
199 separating threshold for each feature is randomly chosen, rather than selected the threshold that  
200 optimally separates the data classes. We require example regions for each class in order to train

201 the Extra-Trees classifier, so we used coalescent simulations to generate these training examples  
202 (described below). Our ultimate goal was to detect introgression within 10kb windows in  
203 *Drosophila*, so to train our classifier properly we simulated chromosomal regions approximating  
204 this length (simulation details are given below). The target window size could easily be altered  
205 by changing the length of the regions simulated for training (i.e. by adjusting the recombination  
206 and mutation rates,  $\theta$  and  $\rho$ ).

207 FILET's feature vector contains a number of single-population summaries of per-base  
208 pair genetic variation:  $\pi$ , the variance in pairwise diversity, the density of segregating sites, the  
209 density of polymorphisms private to the population, Fay and Wu's  $H$  and  $\theta_H$  statistics (Fay and  
210 Wu 2000), and Tajima's  $D$  (Tajima 1989). The feature vector also includes two single-population  
211 summary statistics that are not normalized per base pair:  $Z_{nS}$  (which is averaged across all pairs  
212 of SNPs), and the number of distinct haplotypes observed in the window. Each feature vector  
213 included values of these 9 statistics for each population, yielding 18 single-population statistics  
214 in total. In addition, the two-population statistics included in FILET's feature vector were as  
215 follows:  $F_{ST}$  (following Hudson et al. 1992), Hudson's  $S_{nn}$  (Hudson 2000), per-bp  $d_{xy}$ , per-bp  $d_{min}$ ,  
216  $G_{min}$ ,  $d_{d1}$ ,  $d_{d2}$ ,  $d_{d-Rank1}$ ,  $d_{d-Rank2}$ ,  $Z_X$ ,  $IBS_{MaxB}$  (the length of the maximum stretch of identity by state  
217 [IBS] among all pairwise between-population comparisons), and  $IBS_{Mean1}$  and  $IBS_{Mean2}$  which  
218 capture the average IBS tract length when comparing all pairs of sequences within populations 1  
219 and 2, respectively. These IBS statistics are calculated by examining all pairs of individual  
220 sequences within a population (or across populations in the case of  $IBS_{MaxB}$ ), noting the positions  
221 of differences, and examining the distribution of lengths between these positions (as well as  
222 between the first position and the beginning of the window and between the last position and the  
223 end of the window). Note that we did not include  $RND_{min}$  so that FILET would not require  
224 alignment to an outgroup sequence, although FILET could easily be extended to do so. Instead,  
225 in order to improve robustness to mutational variation, we adopted the approach of drawing the  
226 mutation rate from a wide range of values when generating training examples to train FILET to  
227 classify data from our *Drosophila* samples (see below). All code necessary to run the FILET  
228 classifier (including calculating summary statistics on both simulated and real data sets, training,  
229 and classification) along with the full results of our application to *D. simulans* and *D. sechellia*  
230 (described below) are available at <https://github.com/kern-lab/FILET/>.

231

## 232 **Simulated test scenarios**

233

234 Following Rosenzweig et al. (2016), we used the coalescent simulator msmove  
235 (<https://github.com/geneva/msmove>) to simulate data for testing FILET's power to detect  
236 introgression in populations with four different values of  $T_D$  (the time since divergence):  
237  $0.25 \times 4N$ ,  $1 \times 4N$ ,  $4 \times 4N$ , and  $16 \times 4N$  generations ago, where  $N$  is the population size. For each of  
238 these simulations the population size was held constant (i.e. the ancestral population size equals  
239 that of either daughter population). We developed a classifier for each of these scenarios of  
240 population divergence. Supervised machine learning techniques such as the Extra-Trees

241 classifier require training data consisting of examples from each of the three classes, but in  
242 practice a large number of example loci known to have experienced introgression may not be  
243 available. We therefore simulated training data sets for each of the four values of  $T_D$ . Again  
244 following Rosenzweig et al. (2016), the relevant parameters for each of these simulations  
245 include:  $T_M$ , the time since the introgression event, which we drew from  $\{0.01 \times T_D, 0.05 \times T_D,$   
246  $0.1 \times T_D, 0.15 \times T_D, \dots, 0.9 \times T_D\}$  (i.e. multiples of  $0.05 \times T_D$  up to 0.9, and also including  $0.01 \times T_D$ );  
247 and  $P_M$ , the probability that a given lineage would migrate from the source population to the sink  
248 population during the introgression event, which we drew from  $\{0.05, 0.1, 0.15, \dots, 0.95\}$ . We  
249 simulated an equal number of training examples for each combination of these two parameter  
250 values for both directions of gene flow, yielding  $10^4$  simulations in total for both of these classes,  
251 conditioning that each of these instances must have contained at least one migrant lineage.  
252 Finally, we simulated an equivalent number of samples without introgression, yielding a  
253 balanced training set ( $10^4$  examples for each class). We then computed feature vectors as  
254 described above for each of these training examples, and proceeded with training our Extra-Trees  
255 classifiers by conducting a grid search of all training parameters precisely as described in  
256 Schrider and Kern (2016), and setting the number of trees in the resulting ensemble to 100. All  
257 training and classification with the Extra-Trees classifier was performed using the scikit-learn  
258 Python library (<http://scikit-learn.org>; Pedregosa et al. 2011). We also calculated feature  
259 importance and rankings thereof by training an Extra-Trees classifier of 500 decision trees on the  
260 same training data (using scikit-learn's defaults for all other learning parameters), and then using  
261 this classifier's "feature\_importances\_" attribute. Briefly, this feature importance score is the  
262 average reduction in Gini impurity contributed by a feature across all trees in the forest, always  
263 weighted by the probability of any given data instance reaching the feature's node as estimated  
264 on the training data (Breiman et al. 1984); this measure thus captures both how well a feature  
265 separates data into different classes and how often the feature is given the opportunity to split  
266 (i.e. how often it is visited in the forest). The values of these scores are then normalized across  
267 all features such that they sum to one.

268 For each  $T_D$ , we evaluated the appropriate classifier against a larger set of  $10^4$  simulations  
269 generated for each parameter combination along a grid of values of  $T_M$  and  $P_M$ . The values of  $P_M$   
270 were drawn from the same set as those in training as described above, while one additional  
271 possible value of  $T_M$  was included:  $0.001 \times T_D$ . Also note that for these simulations we did not  
272 require at least one migrant lineage as we had done for training. In addition to test examples for  
273 each direction of gene flow, we simulated  $10^4$  examples where no migration occurred in order to  
274 assess false positive rates. In all of our simulations, both for training and testing, we set locus-  
275 wide population mutation and recombination rates  $\theta$  and  $\rho$  to 50 and 250, respectively, similar to  
276 autosomal values in *D. melanogaster* (Chan et al. 2012) and sampled 15 individuals from each  
277 population. When testing the sensitivity of our method on these data, we considered a window to  
278 be introgressed if FILET's posterior probability of the no-introgression class was  $<0.05$ , except  
279 for the scenario with  $T_D$  equal to  $16 \times 4N$  generations ago in which case we used a posterior  
280 probability cutoff of 0.01, as we found that this step mitigated the elevated false positive rate

281 under this scenario (reducing the rate from >10% to the estimate of 6% shown in Figure S3). In  
282 windows labeled as introgressed, the direction of gene flow was determined by asking which of  
283 the two introgression classes had a higher posterior probability. Note that we used the same  
284 demographic scenario for both the training and test data for each  $T_D$ , and discuss the implications  
285 of demographic model misspecification in the Results and Discussion.

286 In order to compute ROC curves we constructed balanced binary training sets composed  
287 of  $10^4$  examples with no introgression, and  $10^4$  examples allowing for introgression (with equal  
288 representation to each combination of  $T_M$ ,  $P_M$ , and direction of introgression. The score that we  
289 obtained for each test example in order to compute the ROC curve was one minus the posterior  
290 probability of no introgression as generated by the Extra-Trees classifier (i.e. the classifier's  
291 estimated probability of introgression, regardless of directionality).

292

### 293 ***Drosophila sechellia* collection**

294

295 *Drosophila sechellia* flies were collected in the islands of Praslin, La Digue, Marianne and Mahé  
296 with nets over fresh *Morinda* fruit on the ground. All flies were collected in January of 2012.  
297 Flies were aspirated from the nets by mouth (1135A Aspirator – BioQuip; Rancho Domingo,  
298 CA) and transferred to empty glass vials with wet paper balls (to provide humidity) where they  
299 remained for a period of up to three hours. Flies were then lightly anesthetized using FlyNap  
300 (Carolina Biological Supply Company, Burlington, NC) and sorted by sex. Females from the  
301 *melanogaster* species subgroup were individualized in plastic vials with instant potato food  
302 (Carolina Biologicals, Burlington, NC) supplemented with banana. Propionic acid and a pupation  
303 substrate (Kimwipes Delicate Tasks, Irving TX) were added to each vial. Females were allowed  
304 to produce progeny and imported using USDA permit P526P-15-02964. The identity of the  
305 species was established by looking at the taxonomical traits of the males produced from  
306 isofemale lines (genital arches, number of sex combs) and the female mating choice (i.e.,  
307 whether they chose *D. simulans* or *D. sechellia* in two-male mating trials).

308

### 309 **Sequence data and variant calling and phasing**

310

311 We obtained sequence data from 20 *D. simulans* inbred lines (Rogers et al. 2014) from NCBI's  
312 Short Read Archive (BioProject number PRJNA215932). We also sequenced wild-caught  
313 outbred *D. sechellia* individuals (see above) from Praslin ( $n=7$  diploid genomes), La Digue  
314 ( $n=7$ ), Marianne ( $n=2$ ), and Mahé ( $n=7$ ). These new *D. sechellia* genomes are available on the  
315 Short Read Archive (BioProject number PRJNA395473). For each line we then mapped all reads  
316 with bwa 0.7.15 using the BWA-MEM algorithm (Li 2013) to the March 2012 release of the *D.*  
317 *simulans* assembly produced by Hu et al. (2013) and also used the accompanying annotation  
318 based on mapped FlyBase release 5.33 gene models (Gramates et al. 2017). Next, we removed  
319 duplicate fragments using Picard (<https://github.com/broadinstitute/picard>), before using  
320 GATK's (version 3.7; McKenna et al. 2010; DePristo et al. 2011; Auwera et al. 2013)



321 HaplotypeCaller in discovery mode with a minimum Phred-scaled variant call quality threshold  
322 (-stand\_call\_conf) of 30. We then used this set of high-quality variants to perform base quality  
323 recalibration (with GATK's BaseRecalibrator program), before again using the HaplotypeCaller  
324 in discovery mode on the recalibrated alignments. For this second iteration of variant calling we  
325 used the --emitRefConfidence GVCF option in order to obtain confidence scores for each site in  
326 the genome, whether polymorphic or invariant. Finally, we used GATK's GenotypeGVCFs  
327 program to synthesize variant calls and confidences across all individuals and produce genotype  
328 calls for each site by setting the --includeNonVariantSites flag, before inferring the most  
329 probable haplotypic phase using SHAPEIT v2.r837 (Delaneau et al. 2013). The genotyping and  
330 phasing steps were performed separately for our *D. simulans* and *D. sechellia* data, and for each  
331 of step in the pipeline outlined above we used default parameters unless otherwise noted. In  
332 order to remove potentially erroneous genotypes (at either polymorphic or invariant sites), we  
333 considered genotypes as missing data if they had a quality score lower than 20, or were  
334 heterozygous in *D. simulans*. After throwing out low-confidence genotypes, we masked all sites  
335 in the genome missing genotypes for more than 10% of individuals in either species' population  
336 sample, as well as those lying within repetitive elements as predicted by RepeatMasker  
337 (<http://www.repeatmasker.org>). Only SNP calls were included in our downstream analyses (i.e.  
338 indels of any size were ignored).

339

## 340 **Demographic inference**

341

342 Having obtained genotype data for our two population samples, we used  $\partial a \partial i$  to model their  
343 shared demographic history on the basis of the folded joint site frequency spectrum  
344 (downsampled to  $n=18$  and  $n=12$  in *D. simulans* and *D. sechellia*, respectively); using the folded  
345 spectrum allowed us to circumvent the step of producing whole genome alignments to outgroup  
346 species in *D. simulans* coordinate space in order to attempt to infer ancestral states. We used an  
347 isolation-with-migration (IM) model that allowed for continual exponential population size  
348 change in each daughter population following the split. This model includes parameters for the  
349 ancestral population size ( $N_{anc}$ ), the initial and final population sizes for *D. simulans* ( $N_{sim_0}$  and  
350  $N_{sim}$ , respectively), the initial and final sizes for *D. sechellia* ( $N_{sech_0}$  and  $N_{sech}$ , respectively), the  
351 time of the population split ( $T_D$ ), the rate of migration from *D. simulans* to *D. sechellia*  
352 ( $m_{sim \rightarrow sech}$ ), and the rate of migration from *D. sechellia* to *D. simulans* ( $m_{sech \rightarrow sim}$ ). We also fit our  
353 data to a pure isolation model that was identical to our IM model but with  $m_{sim \rightarrow sech}$  and  $m_{sech \rightarrow sim}$   
354 fixed at zero. Our optimization procedure consisted of an initial optimization step using the  
355 Augmented Lagrangian Particle Swarm Optimizer (Jansen and Perez 2011), followed by a  
356 second step of optimization refining the initial model using the Sequential Least Squares  
357 Programming algorithm (Kraft 1988), both of which are included in the pyOpt package for  
358 optimization in Python (version 1.2.0; Perez et al. 2012) as in Schrider et al. (2016). We  
359 performed ten optimization runs fitting both of these models to our data, each starting from a  
360 random initial parameterization, and assessed the fit of each optimization run using the AIC

361 score. Code for performing these optimizations can be obtained from [https://github.com/kern-](https://github.com/kernlab/miscDadiScripts)  
362 [lab/miscDadiScripts](https://github.com/kernlab/miscDadiScripts), wherein `2popIM.py` and `2popIsolation.py` fit the IM and isolation models  
363 described above, respectively. For scaling times by years rather than numbers of generations, we  
364 assumed a generation time of 15 gen/year as has been estimated in *D. melanogaster* (Pool 2015).  
365

### 366 **Training FILET to detect introgression between *D. simulans* and *D. sechellia***

367  
368 Having obtained a demographic model that provided an adequate fit to our data, we set out to  
369 simulate training examples under this demographic history for each of our three classes (i.e. no  
370 migration, migration from *D. simulans* to *D. sechellia*, and from *D. sechellia* to *D. simulans*). For  
371 training examples including introgression,  $T_M$  was drawn uniformly from the range between zero  
372 generations ago and  $T_D/4$ , while  $P_M$  ranged uniformly from (0, 1.0]. In addition, in order to make  
373 our classifier robust to uncertainty in other parameters in our model, for each training example  
374 we drew values of each of the remaining parameters from  $[x-(x/2), x+(x/2)]$ , where  $x$  is our point  
375 estimate of the parameter from  $\partial a \partial i$ . In addition to the parameters from our demographic model  
376 ( $T_D$ ,  $\rho$ ,  $N_{anc}$ ,  $N_{sim}$ , and  $N_{sech}$ ), these include the population mutation rate  $\theta=4N\mu$  (where  $\mu$  was set  
377 to  $3.5 \times 10^{-9}$ ), and the ratio of  $\theta$  to the population recombination rate  $\rho$  (which we set to 0.2).  
378 Continuous migration rates were set to zero (i.e. the only migration events that occurred were  
379 those governed by the  $T_M$  and  $P_M$  parameters, and the no-migration examples were truly free of  
380 migrants). In total, this training set comprised of  $10^4$  examples from each of our three classes.

381 As described above, we masked genomic positions having too many low confidence  
382 genotypes or lying within repetitive elements (described above) before proceeding with our  
383 classification pipeline. While doing so, we recorded which sites were masked within each 10 kb  
384 window in the genome that we would later attempt to classify. In order to ensure that our  
385 masking procedure affected our simulated training data in the same manner as our real data, for  
386 each simulated 10 kb window we randomly selected a corresponding window from our real  
387 dataset and masked the same sites in the simulated window that had been masked in the real one.  
388 We then trained our classifier in the same manner as described above.

389 In order to ensure that this classifier would indeed be able to reliably uncover loci  
390 experiencing recent gene flow between our two populations, we assessed its performance on  
391 simulated test data. First, we applied the classifier to test examples simulated under this same  
392 model (again,  $10^4$  for each class). Next, to address the effect of demographic model  
393 misspecification, we applied our classifier to an isolation model with a different parameterization  
394 and no continuous size change in the daughter populations. For this model we simply set  $N_{sim}$   
395 and  $N_{sech}$  to  $\pi_{sim}/4\mu$  and  $\pi_{sech}/4\mu$ , respectively, where  $\pi$  for a species is the average nucleotide  
396 diversity among all windows included in our analysis after filtering, and  $\mu$  was again set to  
397  $3.5 \times 10^{-9}$ . We then set  $N_{anc}$  to be equal to  $N_{sim}$ , and set  $T$  to  $d_{xy}/(2\mu) - 2N_{anc}$  generations where  $d_{xy}$   
398 is the average divergence between *D. simulans* and *D. sechellia* sequences across all windows.  
399 This latter value is simply the expected TMRCA for cross-species pairs of genomes, minus the  
400 expected waiting time until coalescence during the one-population (i.e. ancestral) phase of the

401 model. This simple model thus produces samples with similar levels of nucleotide diversity for  
402 the two daughter populations as those produced under our IM model, but that would differ in  
403 other respects (e.g. the joint site frequency spectrum and linkage disequilibrium, which would be  
404 affected by continuous population size change after the split). For both test sets we masked sites  
405 in the same manner as for our training data before running FILET.

406

## 407 **Classifying genomic windows with FILET**

408

409 We examined 10 kb windows in the *D. simulans* and *D. sechellia* genomes, summarizing  
410 diversity in the joint sample with the same feature vector as used for classification (see above),  
411 ignoring sites that were masked as described above. We omitted from this analysis any window  
412 for which >25% of sites were masked, and then applied our classifier to each remaining window,  
413 calculating posterior class membership probabilities for each class. We then used a simple  
414 clustering algorithm to combine adjacent windows showing evidence of introgression into  
415 contiguous introgressed elements: we obtained all stretches of consecutive windows with >90%  
416 probability of introgression as predicted by FILET (i.e. the probability of no-introgression class  
417 <10%), and retained as putatively introgressed regions those that contained at least one window  
418 with >95% probability of introgression. In order to test for enrichment of these introgressed  
419 regions for genic/intergenic sequence or particular Gene Ontology (GO) terms from the FlyBase  
420 5.33 annotation release (Gramates et al. 2017), we performed a permutation test in which we  
421 randomly assigned a new location for each cluster or introgressed windows (ensuring the entire  
422 permuted cluster landed within accessible windows of the genome according to our data filtering  
423 criteria). We generated 10,000 of these permutations.

424

## 425 **RESULTS AND DISCUSSION**

426

### 427 **FILET detects introgressed loci with high sensitivity and specificity**

428

429 We sought to devise a bioinformatic approach capable of leveraging population genomic data  
430 from two related population samples to uncover introgressed loci with high sensitivity and  
431 specificity. In the Materials and Methods, we describe several previous and novel statistics  
432 designed to this end. However, rather than preoccupying ourselves with the search for the ideal  
433 statistic for this task, we took the alternative approach of assembling a classifier leveraging many  
434 statistics that would in concert have greater power to discriminate between introgressed and non-  
435 introgressed loci. Supervised machine learning methods have proved highly effective at making  
436 inferences in high-dimensional datasets. In this vein, we designed FILET, which uses an  
437 extension of random forests called an Extra-Trees classifier (Geurts et al. 2006). We previously  
438 succeeded in applying Extra-Trees classifiers for a separate population genetic task—finding  
439 recent positive selection and discriminating between hard and soft sweeps (Schridder and Kern

440 2016; Schrider and Kern 2017)—though other methods such as support vector machines (Cortes  
441 and Vapnik 1995) or deep learning (LeCun et al. 2015) could also be applied to this task.

442 Briefly, FILET assigns a given genomic window to one of three distinct classes—recent  
443 introgression from population 1 into population 2, introgression from population 2 into 1, or the  
444 absence of introgression—on the basis of a vector of summary statistics that contain information  
445 about the two-population sample’s history. This feature vector contains a variety of statistics  
446 summarizing patterns of diversity within each population sample, as well as a number of  
447 statistics examining cross-population variation (see Materials and Methods for a full description).  
448 FILET must be trained to distinguish among these three classes, which we accomplish by  
449 supplying 10,000 simulated example genomic windows of each class, with each example  
450 represented by its feature vector. Once this training is complete, FILET can then be used to infer  
451 the class membership of additional genomic windows, whether from simulated or real data.

452 We began by assessing FILET’s power on a number of simulated datasets, examining  
453 windows roughly equivalent to 10 kb in length in *Drosophila* (Materials and Methods). In  
454 particular, because the power to detect introgression depends on the time since their divergence,  
455  $T_D$ , we measured FILET’s performance under four different values of  $T_D$ , training a separate  
456 classifier for each. In Figure 1 ( $T_D=0.25\times 4N$ ) and Figure S3 ( $T_D$  values of 1, 4, and  $16\times 4N$ ), we  
457 compare FILET’s power to that of two related statistics that have been devised to detect  
458 introgressed windows,  $d_{min}$  and  $G_{min}$  (Materials and Methods). These figures show that FILET  
459 has high sensitivity to introgression across a much wider range of introgression timings ( $T_M$ ) and  
460 intensities ( $P_M$ ) than either of these statistics under each value of  $T_D$ , and that this disparity is  
461 amplified dramatically for smaller values of  $T_D$ . Furthermore, these figures demonstrate that  
462 FILET infers the correct directionality of recent introgression with high accuracy, whereas  $d_{min}$   
463 and  $G_{min}$  contain no information about the direction of gene flow.

464 We also note that for  $d_{min}$  and  $G_{min}$  we established 95% significance thresholds from our  
465 simulated training data without introgression, thereby achieving a false positive rate of 5%. In  
466 order to assess FILET’s false positive rate, we classified a set of test simulations without  
467 introgression and found that FILET’s false positive rate was considerably lower (Figure 1 and  
468 Figure S3) except for our largest value of  $T_D$ , where it was comparable (0.4% for  $T_D=0.25\times 4N$   
469 but ~6% for  $T_D=16\times 4N$ ). Thus, FILET achieves much greater sensitivity to introgression than  
470  $d_{min}$  and  $G_{min}$  often at a much lower false positive rate. We also demonstrate the FILET’s greater  
471 power than these statistics via ROC curves (Figure S4), where it outperforms each statistic under  
472 each scenario. Specifically, the difference in power between FILET and  $d_{min}$  is dramatic for  
473 smaller values of  $T_D$  (area under curve, or AUC, of 0.85 versus 0.73 when  $T_D=0.25\times 4N$  for  
474 FILET and  $d_{min}$ , respectively) but comparatively miniscule for our largest  $T_D$  (AUC of 0.94  
475 versus 0.93 when  $T_D=16\times 4N$ ). It therefore appears that FILET’s performance gain relative to  
476 single statistics is highest for the more difficult task of finding introgression between very  
477 recently diverged populations, while for the easier case of detecting introgression between highly  
478 diverged populations some single statistics may perform nearly as well.

479           Although our goal was to use a set of statistics to perform more accurate inference than  
480 possible using individual ones, our Extra-Trees approach also allows for a natural way to  
481 evaluate the extent to which different statistics are informative under different scenarios of  
482 introgression. To this end, we used the Extra-Trees classifier to calculate feature importance,  
483 which captures each statistic to separate the data into its respective classes (Materials and  
484 Methods). We find that for our lowest  $T_D$  (a split  $N$  generations ago) the top four features, all  
485 with similar importance, are the density of private alleles in population 1, the density of private  
486 alleles in population 2,  $d_{d-Rank1}$ , and  $d_{d-Rank2}$ . For our next-lowest  $T_D$  ( $4N$  generations ago), the top  
487 four, again with similar importance score estimates, are  $F_{ST}$ ,  $Z_X$ ,  $d_{d1}$ , and  $d_{d2}$ . Thus our  $d_d$   
488 statistics seem to be particularly informative in the case of recent introgression between closely  
489 related populations. For the larger values of  $T_D$ ,  $d_{xy}$  and  $d_{min}$  rise to prominence. The complete  
490 lists of feature importance for each  $T_D$  are shown in Table S1.

491           The exceptional accuracy with which FILET uncovers introgressed loci underscores the  
492 potential for machine learning methods to yield more powerful population genetic inferences  
493 than can be achieved via more conventional tools which are often based on a single statistic.  
494 Indeed, machine learning tools have been successfully leveraged in efforts to detect recent  
495 positive selection (Pavlidis et al. 2010; Lin et al. 2011; Ronen et al. 2013; Pybus et al. 2015;  
496 Schrider and Kern 2016), to infer demographic histories (Pudlo et al. 2016), or even to perform  
497 both of these tasks concurrently (Sheehan and Song 2016).

498

### 499 **Joint demographic history of *D. simulans* and *D. sechellia***

500

501           As described in the Materials and Methods, we used publically available *D. simulans* sequence  
502 data (Rogers et al. 2014), and collected and sequenced a set of *D. sechellia* genomes. We  
503 mapped reads from these genomes to the *D. simulans* assembly (Hu et al. 2013), obtaining high  
504 coverage  $>28\times$  for each sequence (see sampling locations, mapping statistics, and Short Read  
505 Archive identifier information listed in Table S2). We do not expect that our reliance on the *D.*  
506 *simulans* assembly resulted in any appreciable bias, as reads from our *D. sechellia* genomes were  
507 successfully mapped to the reference genome at nearly the same rate as reads from *D. simulans*  
508 (Table S2).

509           After completing variant calling and phasing (Materials and Methods), we performed  
510 principal components analysis on intergenic SNPs at least 5 kb away from the nearest gene in  
511 order to mitigate the bias introduced by linked selection (Gazave et al. 2014; Schrider et al.  
512 2016), and observed evidence of population structure within *D. sechellia*. In particular, the  
513 samples obtained from Praslin clustered together, while all remaining samples formed a separate  
514 cluster (Figure S5A). Running fastStructure (Raj et al. 2014) on this same set of SNPs yielded  
515 similar results: when the number of subpopulations,  $K$ , was set to 2 (the optimal value for  $K$   
516 selected by fastStructure's chooseK.py script), our data were again subdivided into Praslin and  
517 non-Praslin clusters. Indeed, across all values of  $K$  between 2 and 8, fastStructure's results were  
518 suggestive of marked subdivision between Praslin and non-Praslin samples, and comparatively

519 little subdivision within the non-Praslin data (Figure S5B). This surprising result differs  
520 qualitatively from previous observations from smaller numbers of loci (Legrand et al. 2009;  
521 Legrand et al. 2011), and underscores the importance of using data from many loci—preferably  
522 intergenic and genome-wide—in order to infer the presence or absence of population structure.

523 Next, we examined the site frequency spectra of the Praslin and non-Praslin clusters,  
524 noting that both had an excess of intermediate frequency alleles in comparison to that of the *D.*  
525 *simulans* dataset (Figure S6), in line with our expectations of *D. sechellia*'s demographic history.  
526 We also note that the Praslin samples contained far more variation (50,243 sites were  
527 polymorphic within Praslin) than non-Praslin samples (4,108 SNPs within these samples). This  
528 difference in levels of variation may reflect a much lesser degree of population structure and/or  
529 inbreeding on the island of Praslin than across the other islands, or may result from other  
530 demographic processes. Additional samples from across the Seychelles would be required to  
531 address this question. In any case, in light of this observation we limited our downstream  
532 analyses of *D. sechellia* sequences to those from Praslin.

533 Because we required a model from which to simulate training data for FILET, we next  
534 inferred a joint demographic history of our population samples using  $\partial a \partial i$  (Gutenkunst et al.  
535 2009). In particular, we fit two demographic models to our dataset: an isolation-with-migration  
536 (IM) model allowing for continuous population size change and migration following the  
537 population divergence, and an isolation model with the same parameters but fixing migration  
538 rates at zero (Materials and Methods). In Table S3 we show our model optimization results,  
539 which show clear support for the IM model over the isolation model. The IM model that  
540 provided the best fit to our data (Figure 2A) includes a much larger population size in *D*  
541 *simulans* than *D. sechellia* (a final size of  $9.3 \times 10^6$  for *D.simulans* versus  $2.6 \times 10^4$  for *sechellia*),  
542 consistent with the much greater diversity levels in *D. simulans* (Begun et al. 2007; Legrand et  
543 al. 2009). This model also exhibits a modest rate of migration, with a substantially higher rate of  
544 gene flow from *D. simulans* to *D. sechellia* ( $2 \times N_{anc} m = 0.086$ ) than vice-versa ( $2 \times N_{anc} m = 0.013$ ).  
545 Thus, the results of our demographic modeling are consistent with the observation of hybrid  
546 males in the Seychelles (Matute and Ayroles 2014), and the possibility of recent introgression  
547 between these two species across a substantial fraction of the genome (see Garrigan et al. 2012;  
548 Navascués et al. 2014).

549 An interesting characteristic of the model shown in Figure 2A is that, assuming 15  
550 generations per year, the estimated time of the *D. simulans*- *D. sechellia* population split is  $\sim 86$   
551 kya, or  $1.3 \times 10^6$  generations ago, in stark contrast to a recent estimate of the of  $2.5 \times 10^6$   
552 generations ago from Garrigan et al. (2012) which was not based on population genomic data,  
553 but rather on single genomes. Supporting our inference, we note that our average intergenic  
554 cross-species divergence of 0.017 yields an average TMRCA of  $\sim 2.5 \times 10^6$  generations ago,  
555 assuming a mutation rate of  $3.5 \times 10^{-9}$  mutations per generation as observed in *D. melanogaster*  
556 (Keightley et al. 2009; Schrider et al. 2013), and this estimate would include the time before  
557 coalescence in the ancestral population. Unless the mutation rate the *D. simulans* species  
558 complex is substantially lower than in *D. melanogaster*, a population split time of  $2.5 \times 10^6$

559 generations ago therefore seems quite unlikely given that the ancestral population size (and  
560 therefore the period of time between the population divergence and average TMRCA) was  
561 probably large (>500,000 by our estimate). Thus, we conclude that the *D. simulans* and *D.*  
562 *sechellia* populations may have diverged more recently than previously appreciated, perhaps  
563 within the last 100,000 years.

564 Although the specific parameterization of our model should be regarded as a preliminary  
565 view of these species' demographic history that is adequate for the purposes of training FILET,  
566 future efforts with larger sample sizes will be required to refine this model. That being said, the  
567 basic features of this model—a much larger *D. simulans* population size than *sechellia*, and a  
568 fairly large ancestral population size—are unlikely to change qualitatively.

569

### 570 **Widespread introgression from *D. simulans* to *D. sechellia***

571

572 *Accuracy and robustness of FILET under estimated model:* Having obtained a suitable model of  
573 the *D. simulans*- *D. sechellia* joint demographic history, we proceeded to simulate training data  
574 and train FILET for application to our dataset (Materials and Methods). After training FILET  
575 and applying it to simulated data under the estimated demographic model, we find that we have  
576 good sensitivity to introgression (56% of windows with introgression are detected, on average),  
577 and a false positive rate of only 0.2% (Figure 2B). Thus, while we may miss some introgressed  
578 loci, we can have a great deal of confidence in the events that we do recover. Our feature  
579 rankings for this classifier are included in Table S1—under this scenario the most informative  
580 feature is  $d_{d-sim}$ . Note that we achieve high accuracy despite some of the difficulties presented by  
581 the demographic model in Figure 2A, most notably the asymmetry in effective population sizes  
582 between our two species. Indeed, because our method is trained under this demographic history,  
583 the characteristics of genealogies demographic model (such as asymmetry in  $\pi$ ) with and without  
584 introgression become the signal used by FILET to make its classifications.

585 As shown in Figure 2B we find that this classifier has greater sensitivity to introgression  
586 from *D. sechellia* to *D. simulans* than vice-versa. The cause of a stronger signal of *D. sechellia*→  
587 *D. simulans* introgression can be understood from a consideration of the  $d_{min}$  statistic under each  
588 of our three classes. When there is no introgression,  $d_{min}$  will be similar to the expected  
589 divergence between *D. simulans* and *D. sechellia*; when there is introgression from *D. simulans*  
590 to *D. sechellia*, we may expect  $d_{min}$  to be proportional to  $\pi_{sim}$ , which may only be a moderate  
591 reduction relative to the no-introgression case given the large population size in *D. simulans*;  
592 when there is introgression from *D. sechellia* to *D. simulans* then  $d_{min}$  is proportional to  $\pi_{sech}$   
593 which is dramatically lower than the expectation without introgression. While many of our  
594 statistics do not rely on  $d_{min}$ , this example illustrates an important property of the genealogy of  
595 introgression from *D. sechellia* to *D. simulans* that would make it easier to detect than gene flow  
596 in the reverse direction.

597 We also tested this classifier's performance on a different demographic scenario (Table  
598 S3) in order to examine the effect of model misspecification during training. In particular, we

599 devised a simple island model with two population sizes: a larger size for *D. simulans* and the  
600 ancestral population ( $7.6 \times 10^5$ ), and a smaller size for *D. sechellia* ( $5.7 \times 10^4$ ) with a split time of  
601  $\sim 59$  kya. Our simple procedure for estimating these values is described in the Materials and  
602 Methods. Again, we find that we have good power to detect introgression with a very low false  
603 positive rate (0.28%; Figure S7). Although there are myriad incorrect models that we could test  
604 FILET against, this example suggests that FILET is robust to demographic misspecification.

605  
606 Application to population genomic data: We applied FILET to 10,185 non-overlapping 10 kb  
607 windows that passed our data quality filters (101.85 Mb in total, or 86.7% of the five major  
608 chromosome arms; Materials and Methods). FILET classified 267 windows as introgressed with  
609 high-confidence, which we clustered into 94 contiguous regions accounting for 2.93% of the  
610 accessible portion of the genome (2.99 Mb in total; Materials and Methods). This finding is  
611 qualitatively similar to a previous estimate (4.6%) by Garrigan et al. (2012) based on  
612 comparisons of single genomes from each species in the *D. simulans* complex. Unlike this  
613 previous effort, FILET is able to infer the directionality of introgression with high confidence  
614 (Figure 2B), and we find evidence that the majority of this introgression has been in the direction  
615 of *D. simulans* to *D. sechellia*: only 21 of the 267 (7.9%) putatively introgressed windows were  
616 classified as introgressed from *sechellia* to *D. simulans*. This finding is not a result of a detection  
617 bias, as we have greater power to detect gene flow from *D. sechellia* to *D. simulans* than in the  
618 reverse direction. Given that our *D. simulans* sequences are from the mainland, one interpretation  
619 of this result is that although there has been recent gene flow from *D. simulans* into the  
620 Seychelles, where *D. simulans* and *D. sechellia* occasionally hybridize, there does not appear to  
621 be an appreciable rate of back-migration to the mainland of *D. simulans* individuals harboring  
622 haplotypes donated from *D. sechellia*. On the other hand, *D. sechellia* alleles may often be  
623 purged from *D. simulans* by natural selection. This may be in part due to the reduced ecological  
624 niche size of *D. sechellia*, such that any alleles which may introgress into *D. simulans* and lead to  
625 preference for or resistance to Morinda fruit may prove deleterious in other environments. More  
626 generally, *D. sechellia* haplotypes introgressing into *D. simulans* may harbor more deleterious  
627 alleles due to their smaller population size, which will be more effectively purged in the larger *D.*  
628 *simulans* population if mutations are not fully recessive (Harris and Nielsen 2016). Tests of these  
629 hypotheses will have to wait for a population sample of genomes from *D. simulans* collected in  
630 the Seychelles.

631 We asked whether our candidate introgressed loci were enriched for particular GO terms  
632 using a permutation test (Materials and Methods), finding no such enrichment. We did observe a  
633 significant deficit in the number of genes either partially overlapping or contained entirely within  
634 introgressed regions in our true set versus the permuted set (297 vs. 373.2, respectively;  
635  $P=0.083$ ; one-sided permutation test). This paucity of introgressed genes is consistent with  
636 introgressed functional sequence often being deleterious.

637 One notable introgressed region on 3R that FILET identified had been previously found  
638 by Garrigan et al. as containing a 15 kb region of introgression. We show that gene flow in this



639 region actually extends for over 200 kb (Figure 3). When Brand et al. (2013) sequenced the 15  
640 kb region originally flagged by Garrigan et al. in a number of *D. simulans* and *D. sechellia*  
641 individuals, they also uncovered evidence of a selective sweep in *D. sechellia* originating from  
642 an adaptive introgression from *D. simulans*. Our data set also supports the presence of an  
643 adaptive introgression event at this locus: a 10 kb window lying within the putative sweep region  
644 (highlighted in Figure 3) is in the lower 5% tail of both  $d_{min}$  (consistent with introgression) and  
645  $\pi_{sech}$  (consistent with a sweep in *sechellia*); this is the only window in the genome that is in the  
646 lower 5% tail for both of these statistics. This region contains two ionotropic glutamate  
647 receptors, *CG3822* and *Ir93a*, which may be involved in chemosensing among other functions  
648 (Benton et al. 2009), and the latter of which appears to play a role in resistance to  
649 entomopathogenic fungi (Lu et al. 2015). Also near the trough of variation within *D. sechellia*  
650 are several members of the *Turandot* gene family, which are involved in humoral stress  
651 responses to various stressors including heat, UV light, and bacterial infection (Ekengren and  
652 Hultmark 2001; Ekengren et al. 2001), and perhaps parasitoid attack as well (Salazar-Jaramillo et  
653 al. 2017). On the other hand, Brand et al. (2013) hypothesize that the target of selection may be a  
654 transcription factor binding hotspot between *RpS30* and *CG15696*, and the phenotypic target of  
655 this sweep remains unclear.

656 Interestingly, this particular window is the only one in this region that is classified by  
657 FILET as having recent gene flow from *D. sechellia* to *D. simulans*. However this classification  
658 may be erroneous as one might expect FILET, which was not trained on any examples of  
659 adaptive introgression, to make an error in such a scenario because rather than gene flow  
660 increasing polymorphism in the recipient population, diversity is greatly diminished if the  
661 introgressed alleles rapidly sweep toward fixation. We note that this window is immediately  
662 flanked by a large number of windows classified as introgressed from *D. simulans* to *D. sechellia*  
663 and which show a large increase in diversity in the recipient population as expected. Moreover,  
664 Brand et al.'s phylogenetic analysis of introgression in this region also supported gene flow in  
665 this direction. Brand et al. also found evidence suggesting that the introgressed haplotype began  
666 sweeping to higher frequency in *D. simulans* (though it has not reached fixation in this species)  
667 prior to the timing of the introgression and subsequent sweep in *D. sechellia*. Thus we conclude  
668 that the adaptive allele probably did indeed originate in *D. simulans* before migrating to *D.*  
669 *sechellia*, and FILET's apparent error in this case underscores the genealogical differences  
670 between adaptive gene flow and introgression events involving only neutral alleles.

671

## 672 **Concluding remarks**

673

674 Here we present a novel machine learning approach, FILET, that leverages population genomic  
675 data from two related populations in order to determine whether a given genomic window has  
676 experienced gene flow between these populations, and if so in which direction. We applied  
677 FILET to a set of *D. simulans* genomes as well as a new set of whole genome sequences from the  
678 closely related island endemic *D. sechellia*, confirming widespread introgression and also

679 inferring that this introgression was largely in the direction of *D. simulans* to *D. sechellia*. Future  
680 work leveraging *D. simulans* data sampled from the Seychelles will be required to determine  
681 whether this asymmetry is a consequence of low rate of migration of *D. simulans* back to  
682 mainland Africa (where our *D. simulans* data were obtained), or whether the directionality of  
683 gene flow is biased on the islands themselves. In addition to creating FILET, we devised several  
684 new statistics, including the  $d_d$  statistics and  $Z_X$  which our feature rankings show to be quite  
685 useful for uncovering gene flow. Despite the success of FILET on both simulated data sets and  
686 real data from *Drosophila*, there are several improvements that could be made. First, by framing  
687 the problem as one of parameter estimation (i.e. regression) rather than classification, we may be  
688 able to precisely infer the values of relevant parameters of introgression events (i.e. the time of  
689 the event and the number of migrant lineages). Deep learning methods, which naturally allow for  
690 both classification and regression, may prove particularly useful for this task (LeCun et al. 2015).  
691 Indeed, Sheehan and Song (2016) used deep learning to infer demographic parameters  
692 (regression) while simultaneously identifying selective sweeps (classification). Another step we  
693 have not taken is to explicitly handle adaptive introgression, which could potentially greatly  
694 improve our approach's power to detect such events.

695 While population genetic inference has traditionally relied on the design of a summary  
696 statistic sensitive to the evolutionary force of interest, a number of highly successful supervised  
697 machine learning methods have been put forth within the last few years (Pavlidis et al. 2010; Lin  
698 et al. 2011; Ronen et al. 2013; Pybus et al. 2015; Pudlo et al. 2016; Schrider and Kern 2016;  
699 Sheehan and Song 2016). As genomic data sets continue to grow, we argue that machine  
700 learning approaches leveraging high dimensional feature spaces have the potential to  
701 revolutionize evolutionary genomic inference.

702

## 703 ACKNOWLEDGMENTS

704

705 We thank Michael Lan for his work on an early iteration of this project. D.R.S. was supported by  
706 NIH award no. K99HG008696. A.D.K. was supported in part by NIH award no. R01GM078204.

707

## 708 REFERENCES

709

710 Andrade López J, Lanno S, Auerbach J, Moskowitz E, Sligar L, Wittkopp P and Coolon J. 2017.  
711 Genetic basis of octanoic acid resistance in *Drosophila sechellia*: functional analysis of a  
712 fine-mapped region. *Mol Ecol* 26: 1148-1160.

713 Auwera GA, Carneiro MO, Hartl C, et al. 2013. From FastQ data to high-confidence variant  
714 calls: the genome analysis toolkit best practices pipeline. *Current protocols in*  
715 *bioinformatics* 43: 11.10. 11-11.10. 33.

716 Barton NH and Hewitt GM. 1985. Analysis of hybrid zones. *Annual review of Ecology and*  
717 *Systematics* 16: 113-148.

718 Begun DJ, Holloway AK, Stevens K, et al. 2007. Population genomics: whole-genome analysis  
719 of polymorphism and divergence in *Drosophila simulans*. *PLoS Biol* 5: e310.

- 720 Benton R, Vannice KS, Gomez-Diaz C and Vosshall LB. 2009. Variant ionotropic glutamate  
721 receptors as chemosensory receptors in *Drosophila*. *Cell* 136: 149-162.
- 722 Brand CL, Kingan SB, Wu L and Garrigan D. 2013. A selective sweep across species boundaries  
723 in *Drosophila*. *Mol Biol Evol* 30: 2177-2186.
- 724 Brandvain Y, Kenney AM, Flagel L, Coop G and Sweigart AL. 2014. Speciation and  
725 introgression between *Mimulus nasutus* and *Mimulus guttatus*. *PLoS Genet* 10:  
726 e1004410.
- 727 Breiman L. 2001. Random forests. *Machine Learning* 45: 5-32.
- 728 Breiman L, Friedman J, Stone CJ and Olshen RA. 1984. Classification and regression trees: CRC  
729 press.
- 730 Chan AH, Jenkins PA and Song YS. 2012. Genome-wide fine-scale recombination rate variation  
731 in *Drosophila melanogaster*. *PLoS Genet* 8: e1003090.
- 732 Cortes C and Vapnik V. 1995. Support-vector networks. *Machine Learning* 20: 273-297.
- 733 Dekker T, Ibba I, Siju K, Stensmyr MC and Hansson BS. 2006. Olfactory shifts parallel  
734 superspecialism for toxic fruit in *Drosophila melanogaster* sibling, *D. sechellia*. *Curr Biol*  
735 16: 101-109.
- 736 Delaneau O, Zagury J-F and Marchini J. 2013. Improved whole-chromosome phasing for disease  
737 and population genetic studies. *Nat Methods* 10: 5-6.
- 738 DePristo MA, Banks E, Poplin R, et al. 2011. A framework for variation discovery and  
739 genotyping using next-generation DNA sequencing data. *Nat Genet* 43: 491-498.
- 740 Ekengren S and Hultmark D. 2001. A family of Turandot-related genes in the humoral stress  
741 response of *Drosophila*. *Biochem Biophys Res Commun* 284: 998-1003.
- 742 Ekengren S, Tryselius Y, Dushay MS, Liu G, Steiner H and Hultmark D. 2001. A humoral stress  
743 response in *Drosophila*. *Curr Biol* 11: 714-718.
- 744 Farine J-P, Legal L, Moreteau B and Le Quere J-L. 1996. Volatile components of ripe fruits of  
745 *Morinda citrifolia* and their effects on *Drosophila*. *Phytochemistry* 41: 433-438.
- 746 Fay JC and Wu C-I. 2000. Hitchhiking under positive Darwinian selection. *Genetics* 155: 1405-  
747 1413.
- 748 Feder JL, Xie X, Rull J, Velez S, Forbes A, Leung B, Dambroski H, Filchak KE and Aluja M.  
749 2005. Mayr, Dobzhansky, and Bush and the complexities of sympatric speciation in  
750 *Rhagoletis*. *Proceedings of the National Academy of Sciences* 102: 6573-6580.
- 751 Fontaine MC, Pease JB, Steele A, et al. 2015. Extensive introgression in a malaria vector species  
752 complex revealed by phylogenomics. *Science* 347: 1258524.
- 753 Garrigan D, Kingan SB, Geneva AJ, Andolfatto P, Clark AG, Thornton KR and Presgraves DC.  
754 2012. Genome sequencing reveals complex speciation in the *Drosophila simulans* clade.  
755 *Genome Res* 22: 1499-1511.
- 756 Gazave E, Ma L, Chang D, et al. 2014. Neutral genomic regions refine models of recent rapid  
757 human population growth. *Proceedings of the National Academy of Sciences* 111: 757-  
758 762.
- 759 Geneva AJ, Muirhead CA, Kingan SB and Garrigan D. 2015. A new method to scan genomes for  
760 introgression in a secondary contact model. *PLoS ONE* 10: e0118621.
- 761 Geurts P, Ernst D and Wehenkel L. 2006. Extremely randomized trees. *Machine Learning* 63: 3-  
762 42.
- 763 Gramates LS, Marygold SJ, Santos Gd, et al. 2017. FlyBase at 25: looking to the future. *Nucleic  
764 Acids Res* 45: D663-D671.

- 765 Green RE, Krause J, Briggs AW, et al. 2010. A draft sequence of the Neandertal genome.  
766 *Science* 328: 710-722.
- 767 Gutenkunst RN, Hernandez RD, Williamson SH and Bustamante CD. 2009. Inferring the joint  
768 demographic history of multiple populations from multidimensional SNP frequency data.  
769 *PLoS Genet* 5: e1000695.
- 770 Harris K and Nielsen R. 2016. The genetic cost of Neanderthal introgression. *Genetics* 203: 881-  
771 891.
- 772 Hedrick PW. 2013. Adaptive introgression in animals: examples and comparison to new  
773 mutation and standing variation as sources of adaptive variation. *Mol Ecol* 22: 4606-  
774 4618.
- 775 Hey J and Kliman RM. 1993. Population genetics and phylogenetics of DNA sequence variation  
776 at multiple loci within the *Drosophila melanogaster* species complex. *Mol Biol Evol* 10:  
777 804-822.
- 778 Hu TT, Eisen MB, Thornton KR and Andolfatto P. 2013. A second-generation assembly of the  
779 *Drosophila simulans* genome provides new insights into patterns of lineage-specific  
780 divergence. *Genome Res* 23: 89-98.
- 781 Huang Y and Erezyilmaz D. 2015. The genetics of resistance to Morinda fruit toxin during the  
782 postembryonic stages in *Drosophila sechellia*. *G3: Genes, Genomes, Genetics* 5: 1973-  
783 1981.
- 784 Hudson RR. 2000. A new statistic for detecting genetic differentiation. *Genetics* 155: 2011-2014.
- 785 Hudson RR, Slatkin M and Maddison W. 1992. Estimation of levels of gene flow from DNA  
786 sequence data. *Genetics* 132: 583-589.
- 787 Huerta-Sánchez E, Jin X, Bianba Z, et al. 2014. Altitude adaptation in Tibetans caused by  
788 introgression of Denisovan-like DNA. *Nature* 512: 194-197.
- 789 Hungate EA, Earley EJ, Boussy IA, Turissini DA, Ting C-T, Moran JR, Wu M-L, Wu C-I and  
790 Jones CD. 2013. A locus in *Drosophila sechellia* affecting tolerance of a host plant toxin.  
791 *Genetics* 195: 1063-1075.
- 792 Jansen PW and Perez RE. 2011. Constrained structural design optimization via a parallel  
793 augmented Lagrangian particle swarm optimization approach. *Computers & Structures*  
794 89: 1352-1366.
- 795 Joly S, McLenachan PA and Lockhart PJ. 2009. A statistical approach for distinguishing  
796 hybridization and incomplete lineage sorting. *The American Naturalist* 174: E54-E70.
- 797 Jones CD. 1998. The genetic basis of *Drosophila sechellia*'s resistance to a host plant toxin.  
798 *Genetics* 149: 1899-1908.
- 799 Jones CD. 2005. The genetics of adaptation in *Drosophila sechellia*. *Genetica* 123: 137.
- 800 Juric I, Aeschbacher S and Coop G. 2016. The strength of selection against Neanderthal  
801 introgression. *PLoS Genet* 12: e1006340.
- 802 Keightley PD, Trivedi U, Thomson M, Oliver F, Kumar S and Blaxter M. 2009. Analysis of the  
803 genome sequences of three *Drosophila melanogaster* spontaneous mutation accumulation  
804 lines. *Genome Res* 19: 1195-1201.
- 805 Kelly JK. 1997. A test of neutrality based on interlocus associations. *Genetics* 146: 1197-1206.
- 806 Kern AD, Jones CD and Begun DJ. 2004. Molecular population genetics of male accessory  
807 gland proteins in the *Drosophila simulans* complex. *Genetics* 167: 725-735.
- 808 Kliman RM, Andolfatto P, Coyne JA, Depaulis F, Kreitman M, Berry AJ, McCarter J, Wakeley J  
809 and Hey J. 2000. The population genetics of the origin and divergence of the *Drosophila*  
810 *simulans* complex species. *Genetics* 156: 1913-1931.

- 811 Kraft D. 1988. A software package for sequential quadratic programming: DFVLR  
812 Obersfaffehofen, Germany.
- 813 Kulathinal RJ, Stevison LS and Noor MA. 2009. The genomics of speciation in *Drosophila*:  
814 diversity, divergence, and introgression estimated using low-coverage genome  
815 sequencing. *PLoS Genet* 5: e1000550.
- 816 LeCun Y, Bengio Y and Hinton G. 2015. Deep learning. *Nature* 521: 436-444.
- 817 Legal L, Chappe B and Jallon JM. 1994. Molecular basis of *Morinda citrifolia* (L.): Toxicity on  
818 *Drosophila*. *J Chem Ecol* 20: 1931-1943.
- 819 Legal L, Moulin B and Jallon JM. 1999. The relation between structures and toxicity of  
820 oxygenated aliphatic compounds homologous to the insecticide octanoic acid and the  
821 chemotaxis of two species of *Drosophila*. *Pestic Biochem Physiol* 65: 90-101.
- 822 Legrand D, Tenailon MI, Matyot P, Gerlach J, Lachaise D and Cariou M-L. 2009. Species-wide  
823 genetic variation and demographic history of *Drosophila sechellia*, a species lacking  
824 population structure. *Genetics* 182: 1197-1206.
- 825 Legrand D, Vautrin D, Lachaise D and Cariou M-L. 2011. Microsatellite variation suggests a  
826 recent fine-scale population structure of *Drosophila sechellia*, a species endemic of the  
827 Seychelles archipelago. *Genetica* 139: 909.
- 828 Li H. 2013. Aligning sequence reads, clone sequences and assembly contigs with BWA-MEM.  
829 *arXiv*.
- 830 Lin K, Li H, Schlötterer C and Futschik A. 2011. Distinguishing positive selection from neutral  
831 evolution: boosting the performance of summary statistics. *Genetics* 187: 229-244.
- 832 Louis J and David J. 1986. Ecological specialization in the *Drosophila melanogaster* species  
833 subgroup: a case study of *D. sechellia*. *Acta oecologica Oecologia generalis* 7: 215-229.
- 834 Lu H-L, Wang JB, Brown MA, Euerle C and Leger RJS. 2015. Identification of *Drosophila*  
835 mutants affecting defense to an entomopathogenic fungus. *Scientific reports* 5.
- 836 Mallet J. 2005. Hybridization as an invasion of the genome. *Trends in ecology & evolution* 20:  
837 229-237.
- 838 Martin SH, Dasmahapatra KK, Nadeau NJ, et al. 2013. Genome-wide evidence for speciation  
839 with gene flow in *Heliconius* butterflies. *Genome Res* 23: 1817-1828.
- 840 Matsuo T, Sugaya S, Yasukawa J, Aigaki T and Fuyama Y. 2007. Odorant-binding proteins  
841 OBP57d and OBP57e affect taste perception and host-plant preference in *Drosophila*  
842 *sechellia*. *PLoS Biol* 5: e118.
- 843 Matute D and Ayroles J. 2014. Hybridization occurs between *Drosophila simulans* and *D.*  
844 *sechellia* in the Seychelles archipelago. *J Evol Biol* 27: 1057-1068.
- 845 McKenna A, Hanna M, Banks E, et al. 2010. The Genome Analysis Toolkit: a MapReduce  
846 framework for analyzing next-generation DNA sequencing data. *Genome Res* 20: 1297-  
847 1303.
- 848 Melo MC, Salazar C, Jiggins CD and Linares M. 2009. Assortative mating preferences among  
849 hybrids offers a route to hybrid speciation. *Evolution* 63: 1660-1665.
- 850 Navascués M, Legrand D, Campagne C, Cariou M-L and Depaulis F. 2014. Distinguishing  
851 migration from isolation using genes with intragenic recombination: detecting  
852 introgression in the *Drosophila simulans* species complex. *BMC Evol Biol* 14: 89.
- 853 Neafsey DE, Barker BM, Sharpton TJ, et al. 2010. Population genomic sequencing of  
854 *Coccidioides* fungi reveals recent hybridization and transposon control. *Genome Res* 20:  
855 938-946.

- 856 Nei M and Li W-H. 1979. Mathematical model for studying genetic variation in terms of  
857 restriction endonucleases. *Proceedings of the National Academy of Sciences* 76: 5269-  
858 5273.
- 859 Nürnberger B, Lohse K, Fijarczyk A, Szymura JM and Blaxter ML. 2016. Para-allopatry in  
860 hybridizing fire-bellied toads (*Bombina bombina* and *B. variegata*): Inference from  
861 transcriptome-wide coalescence analyses. *Evolution* 70: 1803-1818.
- 862 Pardo-Diaz C, Salazar C, Baxter SW, Merot C, Figueiredo-Ready W, Joron M, McMillan WO  
863 and Jiggins CD. 2012. Adaptive introgression across species boundaries in *Heliconius*  
864 butterflies. *PLoS Genet* 8: e1002752.
- 865 Pavlidis P, Jensen JD and Stephan W. 2010. Searching for footprints of positive selection in  
866 whole-genome SNP data from nonequilibrium populations. *Genetics* 185: 907-922.
- 867 Pedregosa F, Varoquaux G, Gramfort A, et al. 2011. Scikit-learn: Machine learning in Python.  
868 *Journal of Machine Learning Research* 12: 2825-2830.
- 869 Perez RE, Jansen PW and Martins JR. 2012. pyOpt: a Python-based object-oriented framework  
870 for nonlinear constrained optimization. *Structural and Multidisciplinary Optimization* 45:  
871 101-118.
- 872 Pool JE. 2015. The mosaic ancestry of the *Drosophila* genetic reference panel and the *D.*  
873 *melanogaster* reference genome reveals a network of epistatic fitness interactions. *Mol*  
874 *Biol Evol* 32: 3236-3251.
- 875 Pudlo P, Marin J-M, Estoup A, Cornuet J-M, Gautier M and Robert CP. 2016. Reliable ABC  
876 model choice via random forests. *Bioinformatics* 32: 859-866.
- 877 Pybus M, Luisi P, Dall'Olio GM, Uzkudun M, Laayouni H, Bertranpetit J and Engelken J. 2015.  
878 Hierarchical boosting: a machine-learning framework to detect and classify hard selective  
879 sweeps in human populations. *Bioinformatics* 31: 3946-3952.
- 880 Quinlan JR. 1986. Induction of decision trees. *Machine Learning* 1: 81-106.
- 881 Raj A, Stephens M and Pritchard JK. 2014. fastSTRUCTURE: variational inference of  
882 population structure in large SNP data sets. *Genetics* 197: 573-589.
- 883 Rogers RL, Cridland JM, Shao L, Hu TT, Andolfatto P and Thornton KR. 2014. Landscape of  
884 standing variation for tandem duplications in *Drosophila yakuba* and *Drosophila*  
885 *simulans*. *Mol Biol Evol* 31: 1750-1766.
- 886 Ronen R, Udpa N, Halperin E and Bafna V. 2013. Learning natural selection from the site  
887 frequency spectrum. *Genetics* 195: 181-193.
- 888 Rosenzweig BK, Pease JB, Besansky NJ and Hahn MW. 2016. Powerful methods for detecting  
889 introgressed regions from population genomic data. *Mol Ecol* 25: 2387-2397.
- 890 Salazar C, Baxter SW, Pardo-Diaz C, Wu G, Surrridge A, Linares M, Bermingham E and Jiggins  
891 CD. 2010. Genetic evidence for hybrid trait speciation in *Heliconius* butterflies. *PLoS*  
892 *Genet* 6: e1000930.
- 893 Salazar-Jaramillo L, Jalvingh KM, de Haan A, Kraaijeveld K, Buermans H and Wertheim B.  
894 2017. Inter-and intra-species variation in genome-wide gene expression of *Drosophila* in  
895 response to parasitoid wasp attack. *BMC Genomics* 18: 331.
- 896 Sankararaman S, Mallick S, Dannemann M, Prüfer K, Kelso J, Pääbo S, Patterson N and Reich  
897 D. 2014. The genomic landscape of Neanderthal ancestry in present-day humans. *Nature*  
898 507: 354-357.
- 899 Schrider DR, Houle D, Lynch M and Hahn MW. 2013. Rates and genomic consequences of  
900 spontaneous mutational events in *Drosophila melanogaster*. *Genetics* 194: 937-954.

- 901 Schrider DR and Kern AD. 2016. S/HIC: Robust Identification of Soft and Hard Sweeps Using  
902 Machine Learning. *PLoS Genet* 12: e1005928.
- 903 Schrider DR and Kern AD. 2017. Soft sweeps are the dominant mode of adaptation in the  
904 human genome. *Mol Biol Evol*: doi: 10.1093/molbev/msx1154.
- 905 Schrider DR, Shanku AG and Kern AD. 2016. Effects of Linked Selective Sweeps on  
906 Demographic Inference and Model Selection. *Genetics* 204: 1207-1223.
- 907 Sheehan S and Song YS. 2016. Deep learning for population genetic inference. *PLoS Comput*  
908 *Biol* 12: e1004845.
- 909 Shiao M-S, Chang J-M, Fan W-L, Lu M-YJ, Notredame C, Fang S, Kondo R and Li W-H. 2015.  
910 Expression divergence of chemosensory genes between *Drosophila sechellia* and its  
911 sibling species and its implications for host shift. *Genome Biol Evol* 7: 2843-2858.
- 912 Tajima F. 1989. Statistical method for testing the neutral mutation hypothesis by DNA  
913 polymorphism. *Genetics* 123: 585-595.
- 914 True JR, Weir BS and Laurie CC. 1996. A genome-wide survey of hybrid incompatibility factors  
915 by the introgression of marked segments of *Drosophila mauritiana* chromosomes into  
916 *Drosophila simulans*. *Genetics* 142: 819-837.
- 917 Turissini DA and Matute DR. 2017. Fine scale mapping of genomic introgressions within the  
918 *Drosophila yakuba* clade. *bioRxiv*: 152421.
- 919 Turner TL, Hahn MW and Nuzhdin SV. 2005. Genomic islands of speciation in *Anopheles*  
920 *gambiae*. *PLoS Biol* 3: e285.
- 921

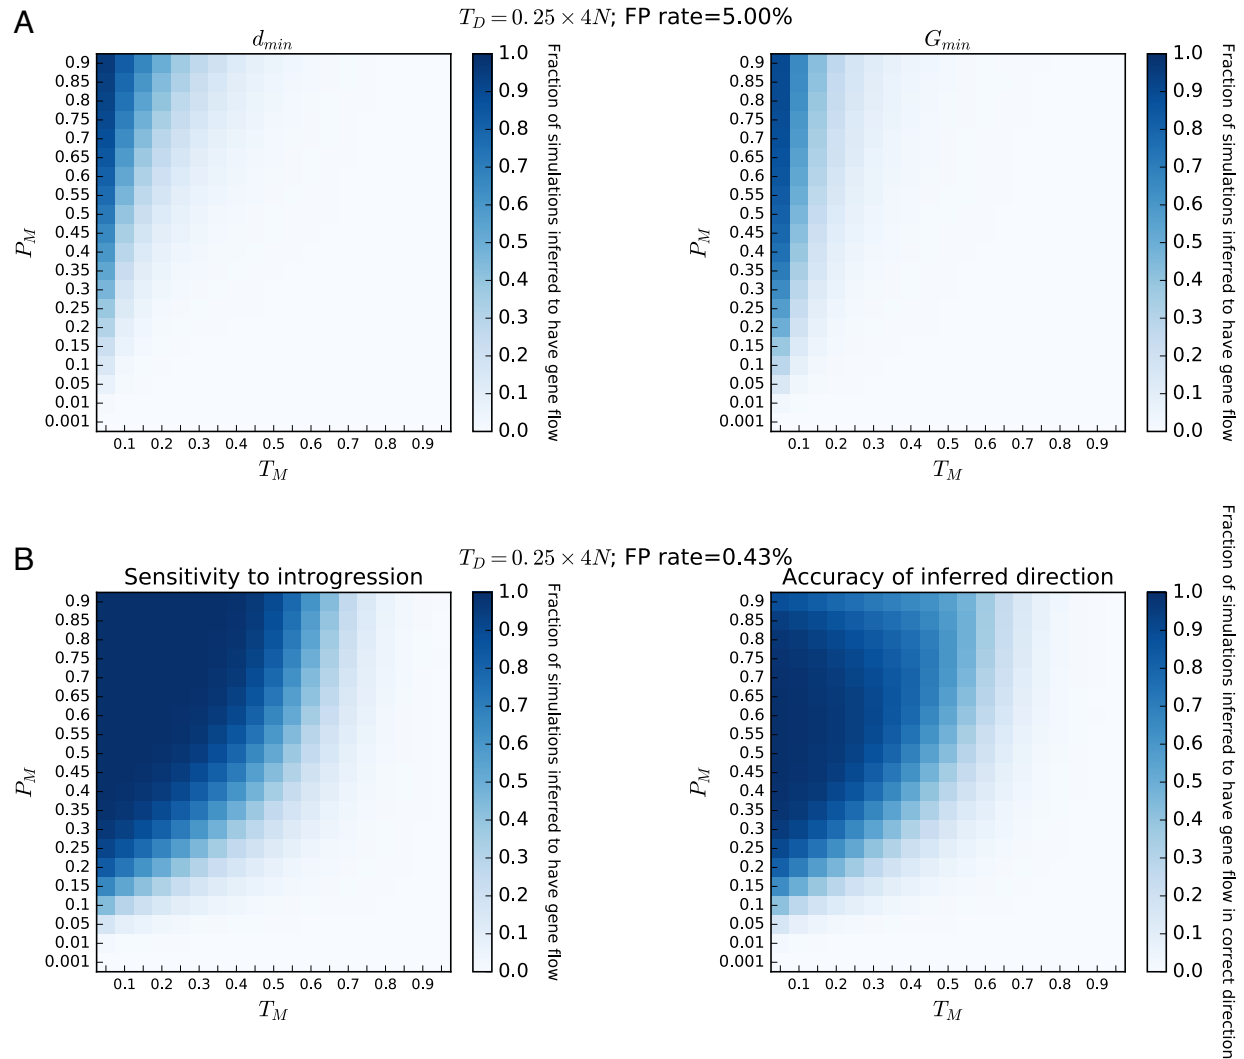

922  
 923 **Fig. 1.** Heatmaps showing several methods' sensitivity to detect introgression. We show the  
 924 fraction of simulated genomic regions with introgression occurring under various combinations  
 925 of migration times ( $T_M$ , shown as a fraction of the population divergence time  $T_D$ ) and intensities  
 926 ( $P_M$ , the probability that a given lineage will be included in the introgression event) that are  
 927 detected successfully by each method. (A) Accuracy of  $d_{min}$  and  $G_{min}$  statistics, where a simulated  
 928 region is classified as introgressed if the values of these statistics are found in the lower 5% tail  
 929 of the distribution under complete isolation (from simulations). Thus, the false positive rate is  
 930 fixed at 5%. (B) The accuracy of FILET on these same simulations. On the left we show the  
 931 fraction of regions correctly classified as introgressed (compare to panel A). On the right, we  
 932 show the fraction of all simulated regions that are not only classified as introgressed, but also for  
 933 which the direction of gene flow was correctly inferred (i.e. if the direction is inferred with 100%  
 934 accuracy for a given cell in the heatmap, the color shade of that cell will be identical to that in  
 935 the heatmap on the left). The false positive rate, as determined from applying FILET to a  
 936 simulated test set with no migration, is also shown.  
 937



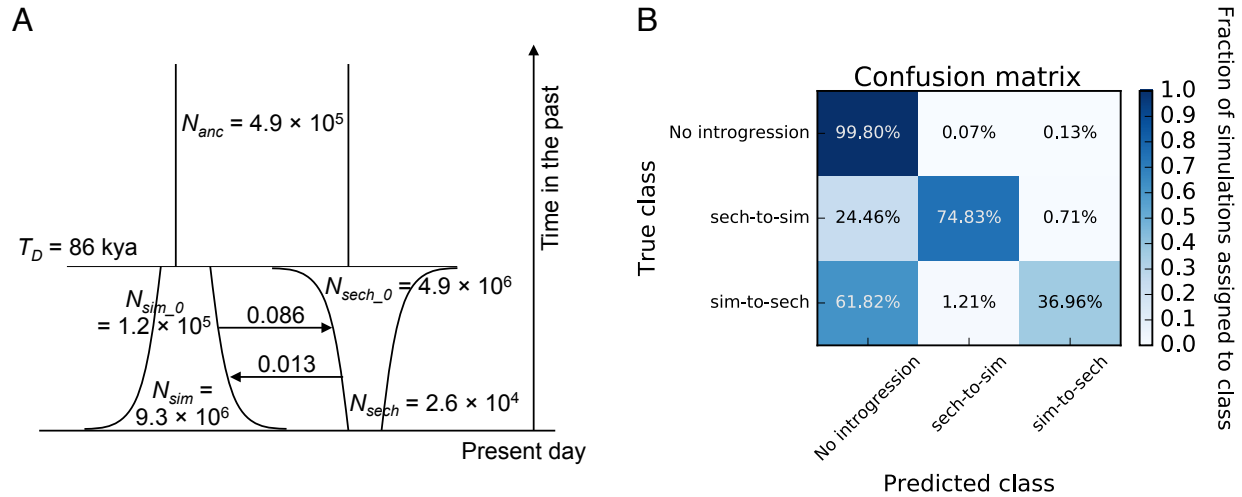

938  
 939 **Fig. 2.** Inferred joint population history of *D. simulans* and *D. sechellia*, and power to detect  
 940 introgression under this model. (A) The parameterization of our best-fitting demographic model.  
 941 Migration rates are shown by arrows, and are in units of  $2 \times N_{anc}m$ , where  $m$  is the probability of  
 942 migration per individual in the source population per generation. (B) Confusion matrix showing  
 943 FILET's classification accuracy under this model as assessed on an independent simulated test  
 944 set. Perfect accuracy would be 100% along the entire diagonal from top-left to bottom-right, and  
 945 the false positive rate is the sum of top-middle and top-right cells.  
 946

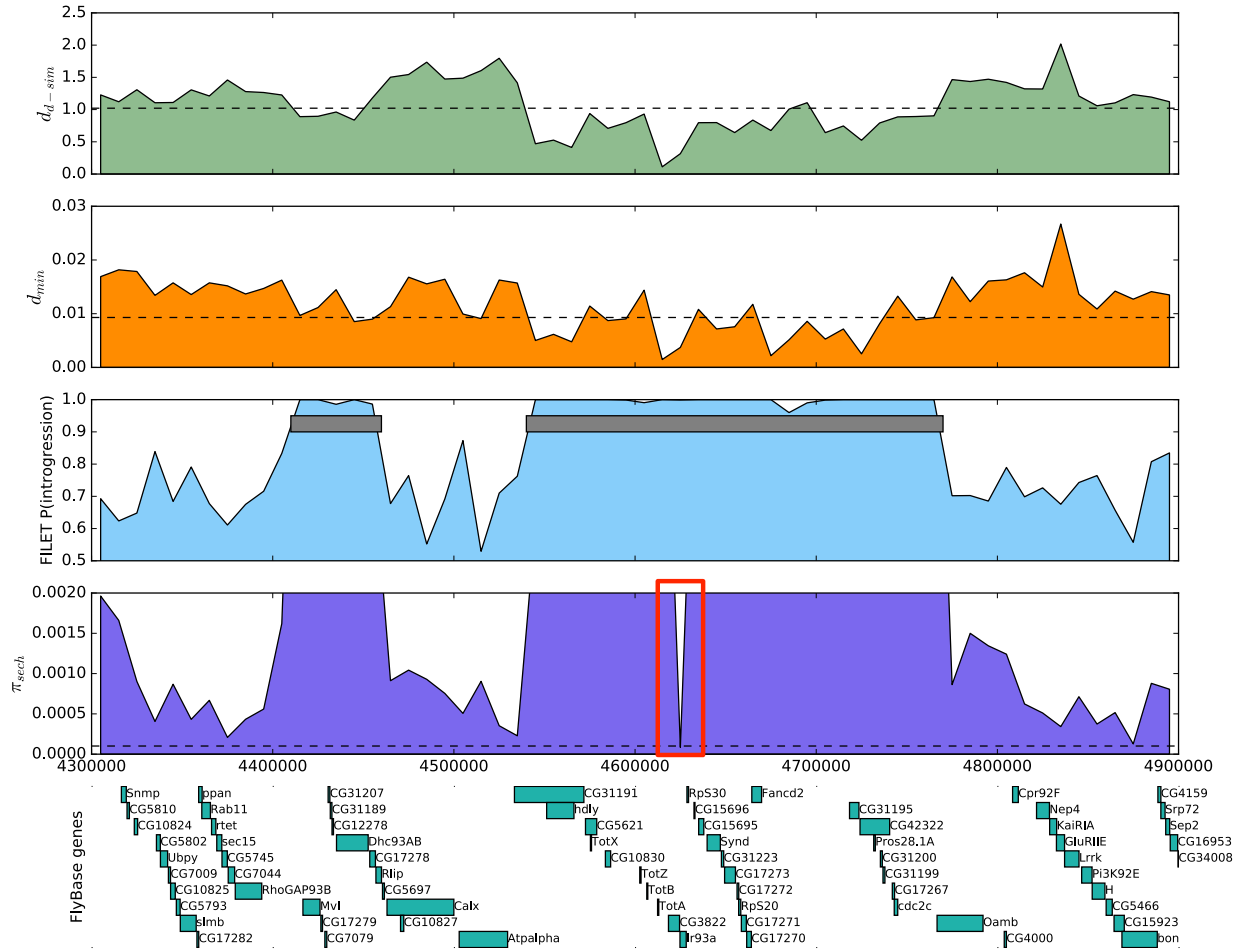

947  
 948 **Fig. 3.** A large genomic region on 3R classified by FILET as introgressed from *D. simulans* to *D.*  
 949 *sechellia*. Values of the  $d_{d-sim}$  and  $d_{min}$  (upper two panels) within each 10 kb window in the region  
 950 are shown, along with the posterior probability of introgression from FILET (i.e.  $1 - P(\text{no}$   
 951  $\text{introgression})$ ). Clustered regions classified as introgressed are shown as gray rectangles superimposed  
 952 over these probabilities. Also shown are windowed values of  $\pi$  in *D. sechellia*, with the sweep region  
 953 highlighted in red, and the locations of annotated genes with associated FlyBase identifiers (Gramates et  
 954 al. 2017).  
 955

956 **SUPPLEMENTAL FIGURE AND TABLE LEGENDS**

957

958 **Figure S1.** Illustration of the difference in values of the  $d_{min}$  statistic calculated from joint  
959 population samples with and without introgression.

960

961 **Figure S2.** Violin plots showing the values of  $d_{min}$ , all four  $d_d$  statistics, and  $Z_X$  under simulated  
962 scenarios including introgression or lacking it for each values of  $T_D$ . The values of these statistics  
963 were obtained from the training data sets described in the Materials and Methods.

964

965 **Figure S3.** Heatmaps showing several methods' sensitivity to detect introgression. Same as  
966 Figure 1, but for other values of  $T_D$ . (A) Accuracy for  $d_{min}$  and  $G_{min}$  when  $T_D = 1 \times 4N$  generations.  
967 (B) Accuracy of FILET when  $T_D = 1 \times 4N$ . (C) and (D) show the same when  $T_D = 4 \times 4N$ . (E) and  
968 (F) show the same when  $16 \times 4N$ .

969

970 **Figure S4.** ROC curves showing power of FILET,  $d_{min}$  and  $G_{min}$  under each value of  $T_D$ . In order  
971 to generate these curves we transformed the classification task into a binary one: discriminating  
972 between isolation and introgression in either direction. (A)  $T_D = 0.25 \times 4N$  generations. (B)  $T_D =$   
973  $1 \times 4N$  generations. (C)  $T_D = 4 \times 4N$ . (D)  $T_D = 16 \times 4N$ . Training and test sets for these problems  
974 contained equal numbers of examples of introgression from population 1 into 2 and introgression  
975 from population 2 into 1.

976

977 **Figure S5.** Population structure within *D. sechellia*. (A) The top three principal components of  
978 all *D. sechellia* diploid genomes. The cluster on the left shows the individuals from Praslin,  
979 while the cluster on the right shows all other individuals. Note that the cluster on the right is far  
980 less dispersed due to the very small amount of polymorphism among these individuals. The  
981 numbers in parentheses on each axis show the fraction of the variance explained by each  
982 principal component. (B) Results of running fastStructure on our *D. sechellia* samples with the  
983 number of subpopulations ( $K$ ) ranging from 2 to 8.

984

985 **Figure S6.** Site frequency spectra of *D. sechellia* samples from Praslin, *D. sechellia* samples  
986 from all other locations, and *D. simulans* samples. The *D. sechellia* samples were both  
987 downsampled to  $n=12$  as described in the text, while *D. simulans* was downsampled to  $n=18$  (i.e.  
988 the same sample sizes used for our demographic inference). These SFS show the fraction of all  
989 polymorphisms found in each bin rather than the raw number of polymorphisms, and thus do not  
990 contain information about the total number of SNPs. As described in the text, there is >12-fold  
991 more polymorphism in the Praslin samples than in the non-Praslin samples.

992

993 **Figure S7.** Confusion matrix showing FILET's classification accuracy when trained under out  
994 inferred model of the *simulans-sechellia* joint demographic history, but applied to test data  
995 generated under a different model (described in Materials and Methods and shown in Table S3).

996 under this model as assessed on an independent simulated test set. Perfect accuracy would be  
997 100% along the entire diagonal from top-left to bottom-right, and the false positive rate is the  
998 sum of top-middle and top-right cells.

999

1000 **Table S1.** Feature importance and rankings for each classifier used in this study.

1001

1002 **Table S2.** Sampling location, sequencing/mapping statistics, and SRA identifiers for each  
1003 genome included in this study.

1004

1005 **Table S3.** Demographic parameter estimates inferred by  $\partial a \partial i$ , along with a simple naïve model.

1006

1007
